# Supplementary material
Source: PubMed Central journal article supplement (PMC4854678)
Supplement: supp_pp.16.01691_PP2015-01691DR1_Supplemental_Material.pdf [file supp_pp.16.01691_PP2015-01691DR1_Supplemental_Material.pdf]

## Supplemental Data

1  
2  
3  
4  
5

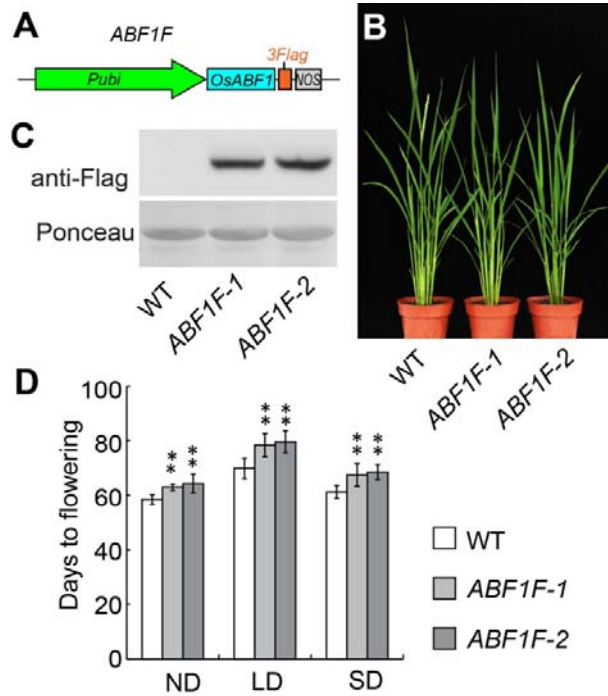

6  
7 **Supplemental Figure S1.** Overexpression of *OsABF1* confers later flowering  
8 phenotype. A, Diagrams of the *OsABF1* overexpression construct. *ABF1F*,  
9 *Pubi:OsABF1-3Flag*. B, Representative flowering image of indicated genotypes  
10 under NDs. C, Protein expression analysis of *ABF1F* in indicated lines. The  
11 immunoblot was probed with anti-Flag antibody. D, Flowering days of each genotype  
12 grown under NDs, LDs or SDs. Mean values  $\pm$  s.d. were shown. The value of each  
13 genotype was compared to that of WT (Student's *t* tests, \*\**P* < 0.01, n=20).  
14

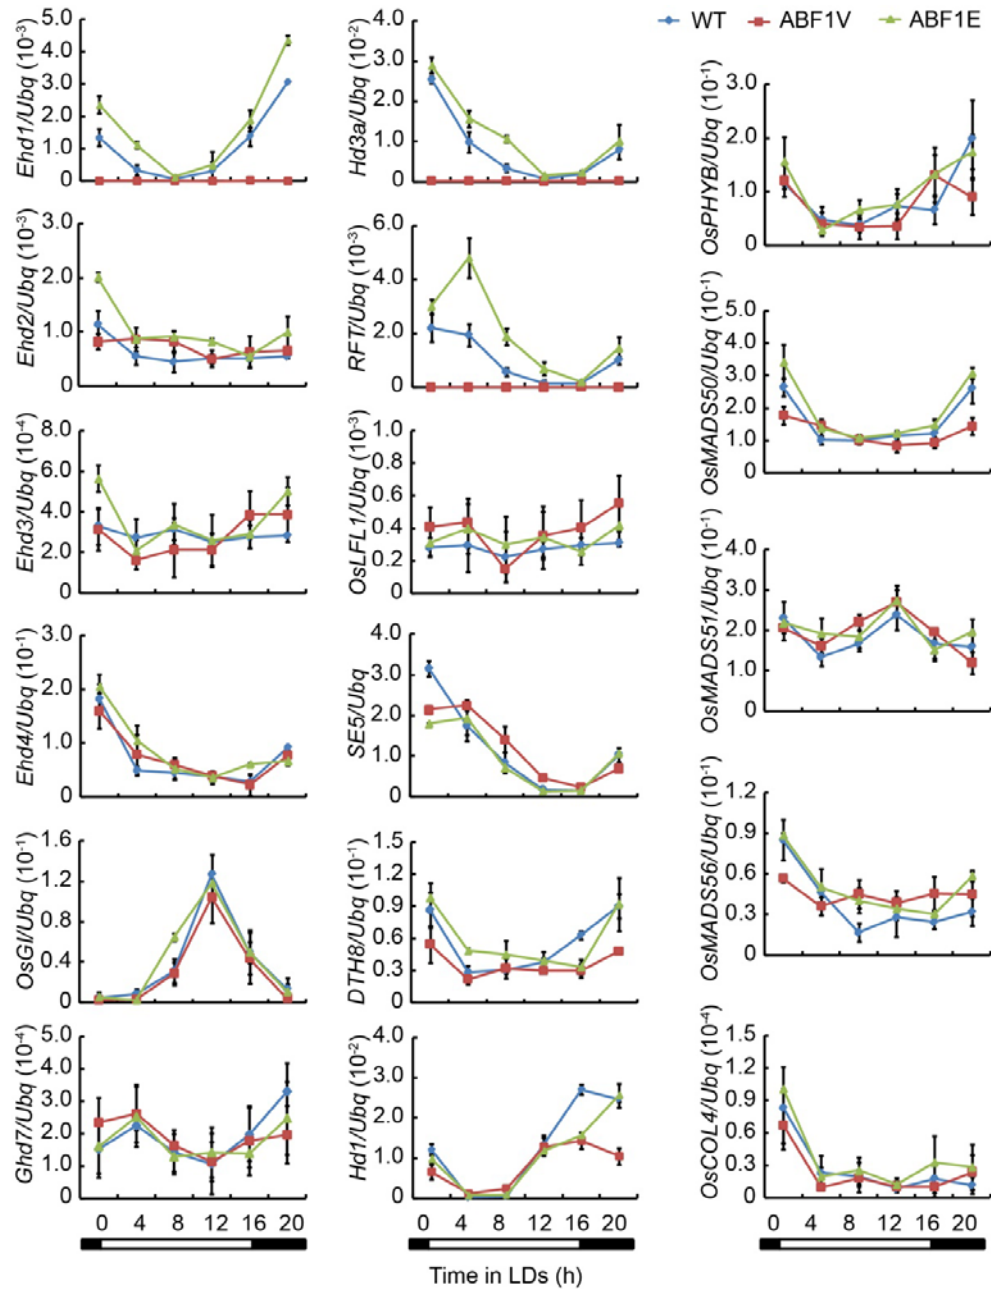

15  
 16  
 17  
 18  
 19  
 20  
 21  
 22

**Supplemental Figure S2.** Transcriptional levels of flowering-associated genes under LDs. Plants were grown for 4 weeks. Samples were collected every 4 hours from the beginning of light period. Three biological replicates of qRT-PCR experiment were performed using *Ubq* gene as the internal control and the representative results were shown. Values were mean  $\pm$  s.d. (n = 3).

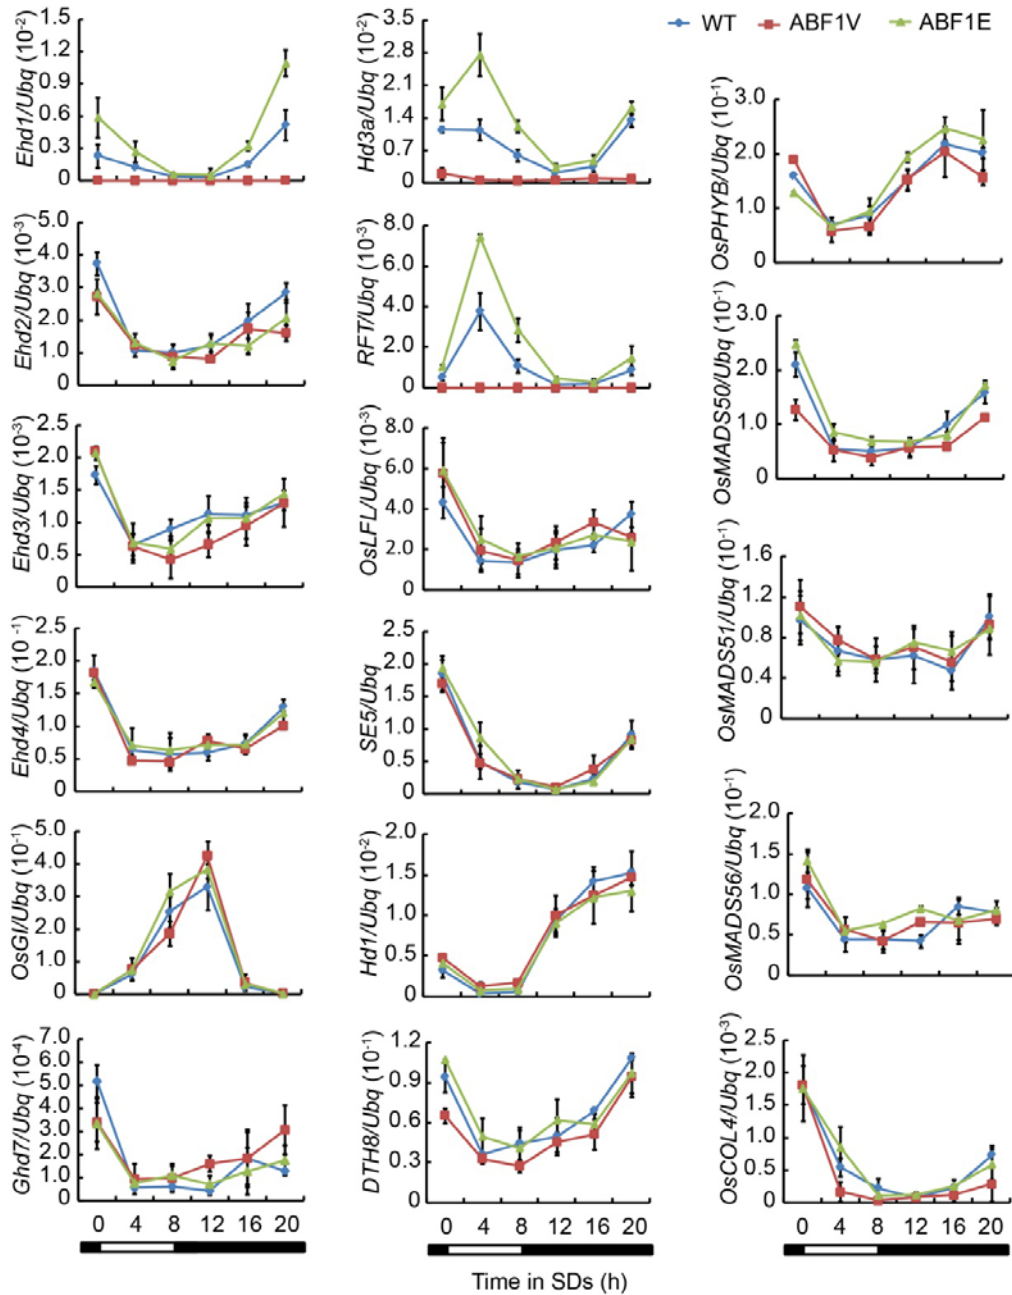

23

24

25 **Supplemental Figure S3.** Transcriptional levels of flowering-associated genes under  
 26 SDs. Plants were grown for 4 weeks. Samples were collected every 4 hours from the  
 27 beginning of light period. Three biological replicates of qRT-PCR experiment were  
 28 performed using *Ubq* gene as the internal control and the presentative results were  
 29 shown. Values were mean  $\pm$  s.d. (n = 3).

30

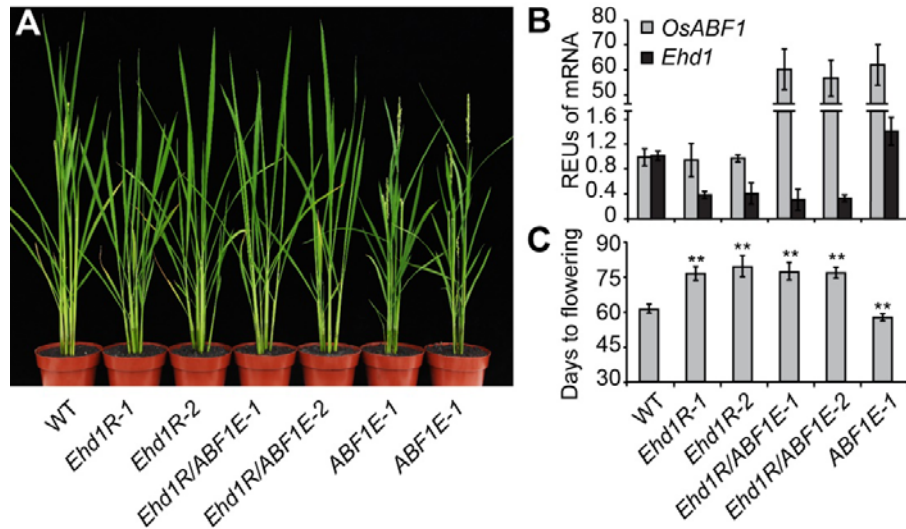

31

32

33 **Supplemental Figure S4.** Knockdown of *Ehd1* suppresses the early flowering  
 34 phenotype of *ABF1E*. A, The flowering phenotypes of indicated genotypes grown  
 35 under NDs. All plants are in Kita-ake background. *Ehd1R* indicates the *Ehd1-RNAi*  
 36 transgenic line in T1 generation. *Ehd1R/ABF1E-1* and *Ehd1R/ABF1E-2* were two  
 37 independent T1 lines generated by stacking transformation of *Ehd1-RNAi* construct  
 38 into *ABF1E-1* homozygous line. B, qRT-PCR analysis of *OsABF1* or *Ehd1* mRNA  
 39 expression in each genotype. The latest fully expanded leaves of 4-week-old seedlings  
 40 grown under LDs were sampled at the end of dark period. The relative expression  
 41 units (REUs) were calculated by the formula: [(*gene/ubq*) of each genotype]/  
 42 [(*gene/ubq*) of WT]. C, Statistic analysis of flowering time of indicated genotypes as  
 43 in A.

44

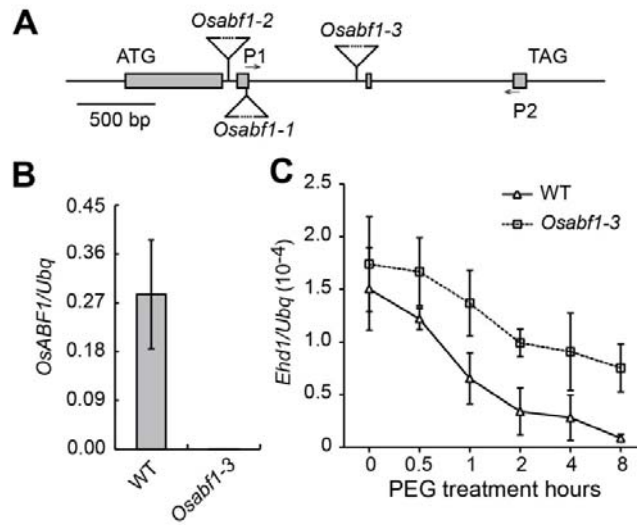

45

46

47 **Supplemental Figure S5.** Analysis of *Ehd1* mRNA expression in *Osabf1-3* mutant. A,  
 48 Schematic diagram showing the T-DNA insertion positions in *Osabf1-1*, *Osabf1-2* and  
 49 *Osabf1-3* mutant alleles. The boxes and solid lines present exons and introns  
 50 respectively. B, Analysis of *OsABF1* mRNA level in WT and *Osabf1-3* by qRT-PCR  
 51 using a pair of primers P1 and P2 as indicated in A. C, Dynamic transcription of *Ehd1*  
 52 in WT under PEG treatment for the indicated periods. The seedlings were grown  
 53 under continue light for 4 weeks and then subjected to PEG treatment.

54

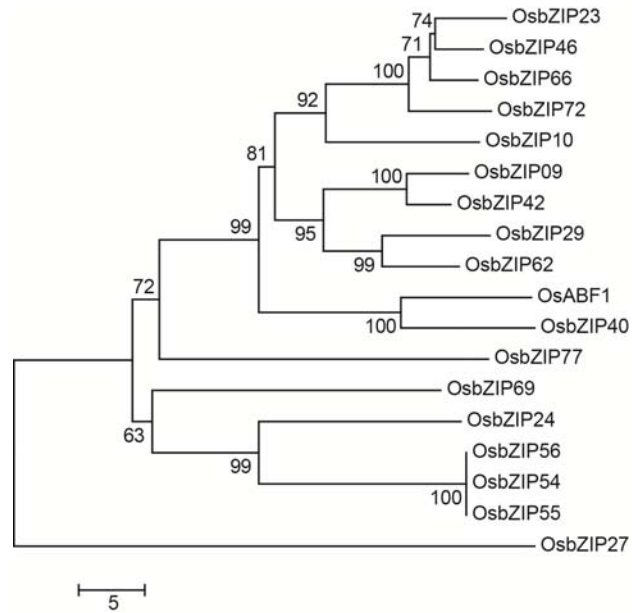

55

56

57 **Supplemental Figure S6.** Phylogenetic tree of OsABF1 and homologous proteins.  
 58 Protein sequences were downloaded from the MSU Rice Genome Annotation Project  
 59 ([http://rice.plantbiology.msu.edu/analyses\\_search\\_locus.shtml](http://rice.plantbiology.msu.edu/analyses_search_locus.shtml)) databases and then  
 60 used for Neighbor-joining phylogenetic analysis (MEGA5.2). The scale bar indicates  
 61 substitutions per site.

62

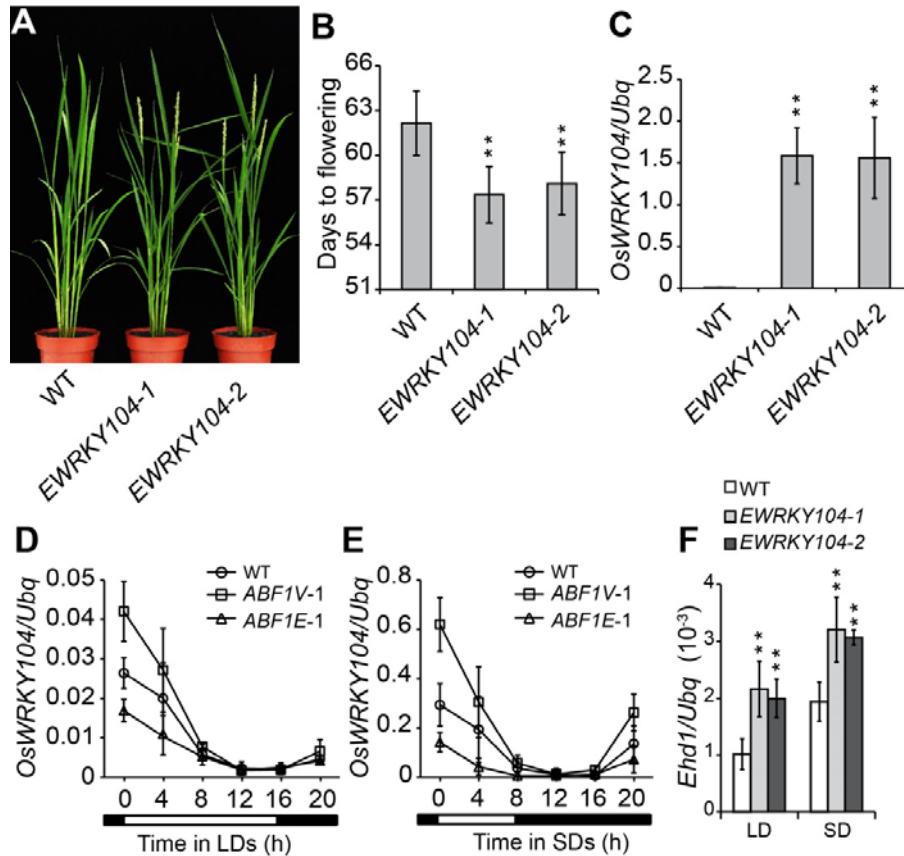

63

64

65 **Supplemental Figure S7.** EAR-OsWRKY104 hybrid transcription factor leads to  
 66 early flowering phenotype. A, Representative flowering image of indicated genotypes  
 67 cultured under NDs. *EWRKY104*, *Pubi:EAR4-OsWRKY104*. B, Flowering time of  
 68 each genotype as in A. Mean values  $\pm$  s.d. (standard deviations) were shown. The  
 69 value of each genotype was compared to that of WT (Student's *t* tests, \*\**P* < 0.01,  
 70 *n*=20). C, qRT-PCR analysis of *OsWRKY104* mRNA level in each genotype. The  
 71 leaves of 4-week-old seedlings were sampled just at the end of dark period under SDs.  
 72 D and E, qRT-PCR analysis of the dynamic expression of *OsWRKY104* mRNA under  
 73 LDs or SDs. F, qRT-PCR analysis of *Ehd1* mRNA level in each genotype cultured  
 74 under LDs or SDs. The samples were collected just at the end of dark period.

75

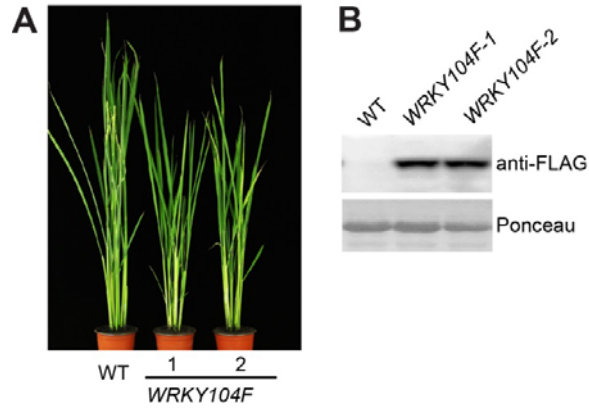

76

77

78 **Supplemental Figure S8.** Overexpression of *OsWRKY104* confers later flowering

79 phenotype. A, Representative flowering image of indicated genotypes under LDs.

80 *WRKY104F*, *Pubi:OsWRKY104-3Flag*. B, Protein expression analysis of *WRKY104F*

81 in indicated lines. The immunoblot was probed with anti-Flag antibody.

82



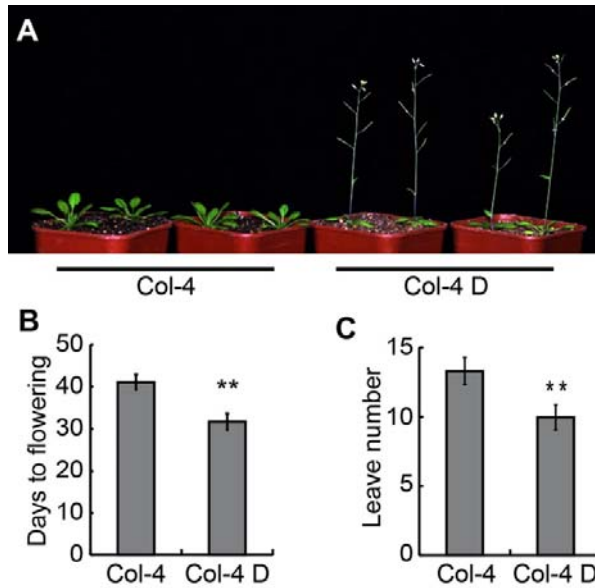

83

84

85 **Supplemental Figure S9.** Drought accelerates flowering in Arabidopsis. A, Image of  
 86 5-week-old Columbia ecotype (Col-4) plants grown in normal (Left) or drought (right,  
 87 Col-4 D) condition under LDs. B, Flowering time of the plants as in A (Student's *t*  
 88 tests, \*\* $P < 0.01$ ,  $n = 20$ ). C, Leaf number of the plants as in A (Student's *t* tests, \*\* $P$   
 89  $< 0.01$ ,  $n = 20$ ).

90

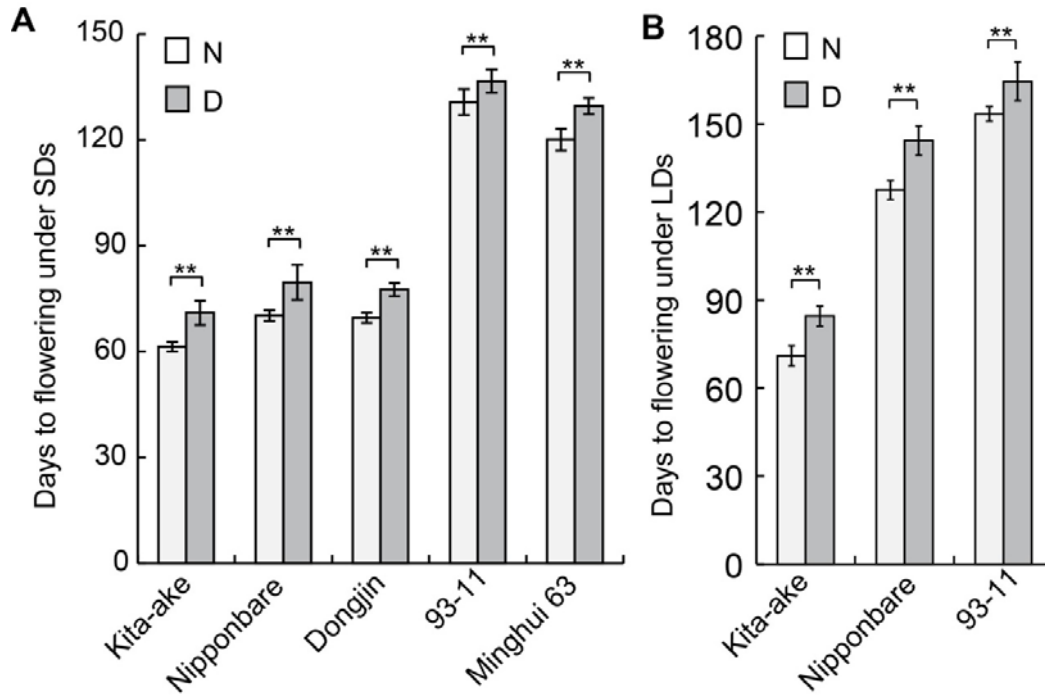

91

92

93 **Supplemental Figure S10.** Drought delays flowering in rice. A, Flowering time of  
 94 *japonica* cultivars (Kita-ake, Nipponbare, Dongjin) and *indica* cultivars (93-11,  
 95 Minghui 63) grown in normal (N) or drought condition (D) under SDs (Student's *t*  
 96 tests, \*\* $P < 0.01$ ,  $n = 20$ ). B, Flowering time of indicated cultivar grown in normal (N)  
 97 or drought condition (D) under LDs (Student's *t* tests, \*\* $P < 0.01$ ,  $n = 20$ ).  
 98



130 cggcatggaanaatcaagaacaaccaggcaccgacgccgtggaatgcccacatgtgtggaggaaacgggcggttggccaggcgtaagcggct  
131 gggttgtctgccggccctgcaatggcactggaaccccccaagcccagggaatcggcgtgacggctgcaaacatccgccccgtacaaatcg  
132 gcgcgcgctgggtgatgacctggtggagaagtgaaggccgagccgcccagcggcaacgcatcaggcagaagcagccccgggt  
133 gaatcgtggcaagcggcctgatcgaatccgaaagaatccggcaaccgcccggcagccgggtgcccgtgattaggaagccgccaag  
134 ggcgacgagcaaccagatTTTTCTCCGATGCTCTATGACGTGGGCACCCGCGATAGTCGAGCATCATGGACGTGGCCGTTTTCCGTCTGT  
135 cgaagcgtgaccgacgagctggcgaggtgatccgctacgagcttcagacgggcacgtagaggtttccgaggccggccggcatggcca  
136 gtgtgtgggattacgacctgtactgatggcggtttccatctaaccgaatccatgaaccgataccgggaagggaaggagacaagccgg  
137 ccgctgttccctcacacgttgcggacgtactcaagtctgcccggcagccgatggcggaaagcagaaagacgacctgtagaaacctgc  
138 attcggtaaaccacgcacgttccatgacgctacgaagaaggccaagaacggccgctggtgacgggtatccgagggtgaaccttga  
139 ttaccgctacaagatcgtaaagagcgaaccggggcgccggagtacatcgagatcgagctagctgattggatgaccgagatcacaga  
140 aggcagaaccggagcgtgctgacggttccccgattctttgatcgatccggcatcggcgttttcttaccgctggcacccgccc  
141 gcaggcaaggcagaagccagatggttcaagacgatctacgaacgagtgaggcagcgggagagttcaagaattctgtttaccgtgc  
142 gcaagctgacgggtcaaatgacctgcccggagtacgtttgaaggaggaggcggggcaggctggcccgatcctagtcatgctaccgcaa  
143 cctgatcagggcgaagcatccgccggttctaatagtacggagcagatgtagggcaaatgccctagcaggggaaaaaggctgaaaagg  
144 tctcttctgtggatagcagtcattgggaaccaaagccgtacattgggaaccggaacccgtacattgggaaccaaagccgtacattg  
145 ggaaccggtcacacatgtaagtactgtatataaaagagaaaaaggcgattttccgctaaaaacttttaaaacttataaaactttaa  
146 acccgctggcctgtgcataactgtctggccagcgcacagccgaagagctgcaaaaagcgcctaccctcggtcgtcgtcctctacgcc  
147 cgcgcttcgctggccctatcgggccgctggcctcaaaaatggctggcctacggccaggcaatctaccagggcgggacaagccgcg  
148 ccgtgccactcgaccggcgccacatcaaggcacctgctcgcgctttcggtgatgacgggtgaaaacctctgacacatcgagctcc  
149 cggagacgggtcacagctgtgtaagcggatgcccggagcagacaagccgtcagggcgcgtcagcgggtgtgggggtgctggggcg  
150 cagccatgaccagtcagtagcagatagcggagtatactggcttaactatgcccagatcagagcagattgtagtagtgacccatgac  
151 ggtgtgaaataccgacagatgctgaaggagaaaataccgcatcaggcgtcttccgcttctcgtcactgactcgtcgtcgtcgtctc  
152 ggctcggcgagcgggtatcagctcactcaaaaggcggtatacggttatccacagaatcaggggataacgaggaaagaacatgtgagcaa  
153 aaggccagcaaaaaggccaggaaccgtaaaaaggccgctgtgctggcgttttccataggctccgccccctgacgagcatcacaaaaatcg  
154 acgctcaagttaggtggcgaacccgacaggactataagataaccaggcgtttccccctggaagctccctcgtcgtcctctgttccga  
155 ccctgccgttaccggatacctgtccgcttctccttcgggaagcgtggcgtttctcatagctcacgctgtaggtatctcagttcgggtgtagg  
156 tcgttcgtccaagctgggtgtgtgacgaacccccgttcagcccagcctgctccttatccggtaaactatcgtcttagtccaacccggt  
157 aagacacgacttatcgccactggcagcagccactgtaacagattagcagagcaggtatgtaggggtgtacagattctgaagtgg  
158 tggcctaactcggctacactagaaggacagatattggatctgctcgtgtaagccagttacctcggaaaaagagttgtagctcttgat  
159 ccggcaaaacaaaccgctgtagcgggtgtttttgttcaagcagcagattacgagcaaaaaaggatcgaagaagatcctttg  
160 atctttctacgggtgctgacgctcagtggaacgaaaactcacgttaagggattttggtcatgattctaggtactaaaacattcatcagta  
161 aaataataatttttctcccaatcaggcttgatccccagtaagtcaaaaatagctgcacatactgttctccccgatactccctgatcg  
162 accggacgagaaggcaatgtcataccactgtccgctcctcccaagatcaataaagccacttcttccatctttcacaagat  
163 gttgctgtcctccaggtcgggtgggaaaagacaagtctcctcgggcttttccgcttttaaaaaatcatacagctcgcgaggtctttaaag  
164 gagtgtcttctccagttttcgaatccacatcgccagatcgtattcagtaagtaatccaattcggtaagcggctgtcaagctattcgtat  
165 agggacaatccgatatgctgatggagtgaagagcctgatgactccgatacagctcagataatctttcagggctttgtcatctcactct  
166 tccgagcaaaaggacgcatcggcctcactcatgagcagattgctcagccatcatgcccgtcaaaagtcaggaccttggaaacaggcagctt  
167 tcctccagccatagcatcatgctctttccgttccacatcataggtggcttataaccggtgctcgtcatttttaataaggtttctatttc  
168 tcccaccgcttataccttagcaggagacattccttccgtatctttacgagcggatattttcgtatcagtttttcaatccgggtgatattctca  
169 ttttagccattatttcttctcttcttacagttttaaagatacccaagaagctaatataacaagacgaactccaattcactgttctctg  
170 cattctaaaaccttaataaccagaaaaagcgttttcaaaagtgttttcaaaagtggcgataacatagatcgacggagccggtttgaaacc  
171 gcgggtgatcagggcagcaacgctctgctacgttacaatcaaatgctaccctccgagatcatccgtttcaaacggcagcttagttg  
172 ccgttctcgaatagatcggttaacatgagcaaaagtctgcccttaaacggctctcccgtgacgctcccggactgatgggctcctg  
173 tatcagtggtgattttgtccgagctccggctggggagctgttgctggctggtggcaggatattgtggtgtaaacaaattgacgcttag



---

218 acaagacgatgacgataaagtcgagatggactacaagacgatgacgataaagtcgagatggactacaagacgatgacgataaagtc  
219 gaggggggcccctgaggatcccgggaattctaagaggagtccacatggtagatctgactagtgttaacg

220

221 **Supplemental Figure S11.** Vector map and completed sequence of pHCF.

222

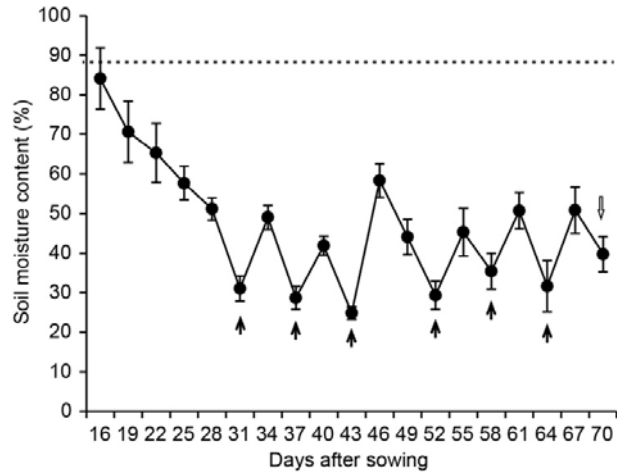

223

224

225 **Supplemental Figure S12.** The soil moisture contents during drought regime  
 226 experiment. The arrows and the hollow arrow indicate irrigation time and flowering  
 227 time of WT under drought treatment respectively. The dash line indicates saturated  
 228 soil moisture content. The soil moisture content was calculated by the formula:  $[(\text{total soil weight}) - (\text{dry soil weight})]/(\text{dry soil weight})$ . Values were mean  $\pm$  s.d. (n = 5).

229

230

**Supplemental Table S1.** Oligonucleotide primers used in this study.

| Experiment | Primer name                    | Sequence                         |
|------------|--------------------------------|----------------------------------|
| qRT-PCR    | Ubq-QF                         | 5' AACCAGCTGAGGCCCAAGA 3'        |
|            | Ubq-QR                         | 5' ACGATTGATTTAACCAGTCCATGA 3'   |
|            | Ehd1-QF                        | 5' CCTACAGTGATTATGGCTTCA 3'      |
|            | Ehd1-QR                        | 5' GTGCTGCCAAATGTTGCTC 3'        |
|            | Hd1-QF                         | 5' TCAGCAACAGCATATCTTTCTCATCA 3' |
|            | Hd1-QR                         | 5' TCTGGAATTTGGCATATCTATCACC 3'  |
|            | Ehd2-QF                        | 5' CGACGACAATAGCTCGATCGC 3'      |
|            | Ehd2-QR                        | 5' GTGCATGGTCACGGAGCCTT 3'       |
|            | Ehd3-QF                        | 5' GGACCACCTCGTCACCTACAA 3'      |
|            | Ehd3-QR                        | 5' CGCCGTTGGCCATGAG 3'           |
|            | Ehd4-QF                        | 5' CAGCCAGCGGAATCATCAC 3'        |
|            | Ehd4-QR                        | 5' CCAAATCCATCAGACCTACTCCT 3'    |
|            | OsMADS50-QF                    | 5' CAGGCCAGGAATAAGCTGGAT 3'      |
|            | OsMADS50-QR                    | 5' TTAGGATGGTTTGGTGTTCATTGC 3'   |
|            | OsMADS51-QF                    | 5' GTTTGCTCTGCTCCTACTC 3'        |
|            | OsMADS51-QR                    | 5' ACTCCTCCTCCAGCATTGAA 3'       |
|            | OsMADS56-QF                    | 5' GACCGCTATAAAGCATAACACA 3'     |
|            | OsMADS56-QR                    | 5' TCATGTGGTTAGCCACCAGC 3'       |
|            | OsGI-QF                        | 5' GATAGACGGCACTTCAGCAGAT 3'     |
|            | OsGI-QR                        | 5' TGGAGAAAGGTTGTGGATGC 3'       |
|            | COL4-QF                        | 5' GGAATCAAGGCCATCGGG 3'         |
|            | COL4-QR                        | 5' CGAGCCC GCCGACAG 3'           |
|            | SE5-QF                         | 5' AGGACTCCCAAGCTTTTATC 3'       |
|            | SE5-QR                         | 5' CTCCAGAATACGAGAACGAC 3'       |
|            | OsphyB-QF                      | 5' ATGGAACAGACACAATGCTT 3'       |
|            | OsphyB-QR                      | 5' AGCATAACCATATCAGCTT 3'        |
|            | DTH8-QF                        | 5' CAGGAGTGC GTGTCGGAGTT 3'      |
|            | DTH8-QR                        | 5' GGTCGTCGCCGTTGATGGT 3'        |
|            | LFL-QF                         | 5' TTGTCATCGGAGCAAAGAAGG 3'      |
|            | LFL-QR                         | 5' TGCCATGGGAGAGAGATAGTCA 3'     |
|            | Hd3a-QF                        | 5' GCTCACTATCATCATCCAGCATG 3'    |
|            | Hd3a-QR                        | 5' CCTTGCTCAGCTATTTAATTGCATAA 3' |
|            | RFT1-QF                        | 5' TGACCTAGATTCAAAGTCTAATCCTT 3' |
|            | RFT1-QR                        | 5' TGCCGGCCATGTCAAATTAATAAC 3'   |
|            | Ghd7-QF                        | 5' GTCGCCAAATTATCAGGTGAAAA 3     |
|            | Ghd7-QR                        | 5' ACAGGCCACATCCTTCTCCG 3'       |
|            | OsABF1-QF                      | 5' GGAGGAGAACGCCAAGATGT 3'       |
|            | OsABF1-QR                      | 5' GATCTCGTGCTGACGTTTTCC 3'      |
|            | OsABF1-RNAi-QF                 | 5' GGAGATGACGCTGGAGGACTT 3'      |
|            | OsABF1-RNAi-QR                 | 5' CCATCACCACCTGCCCT 3'          |
| OsZIP40-QF | 5' AGGAGAAAAATCAAAGAGGCTTAA 3' |                                  |



|              |                  |                                                   |
|--------------|------------------|---------------------------------------------------|
|              | OsZIP40-QR       | 5' TTCCATTGAGTTGGTTCTTCGTA 3'                     |
|              | OsZIP72-QF       | 5' AGATATCATGGAAATGCAGAAAAAT 3'                   |
|              | OsZIP72-QR       | 5' GGACCAGTCAGTGTCTTCGC 3'                        |
|              | OsZIP23-QF       | 5' AAATGTTGGAGCAGCAAAAGAA 3'                      |
|              | OsZIP23-QR       | 5' CCCGTCAGAGTCCTCCGAA 3'                         |
|              | OsZIP10-QF       | 5' CGCTCGTCTCAAAGAGGCAG 3'                        |
|              | OsZIP10-QR       | 5' ATTCATCTTCTCCTTGGACTGCT 3'                     |
|              | OsZIP66-QF       | 5' CATCTTCTTCGGAACTACGG 3'                        |
|              | OsZIP66-QR       | 5' GACATCAGCCTATTCCCATG 3'                        |
|              | OsZIP46-QF       | 5' GCAGAAAAAGCAGGTGGAAAT 3'                       |
|              | OsZIP46-QR       | 5' GTCAGTGTTCGTCCGAGGC 3'                         |
|              | OsZIP09-QF       | 5' TTCAAGAGCCAGGAAGCAGG 3'                        |
|              | OsZIP09-QR       | 5' GAAATCTGCGGAGCTTGTCTC 3'                       |
|              | OsZIP42-QF       | 5' CAGGGGAGATTGCAGATAAGCT 3'                      |
|              | OsZIP42-QR       | 5' CGAGCTTGTTCCGCTGAGTT 3'                        |
|              | WRKY104-QF       | 5' GCTTGCTCTTCAACTCTTGGGA 3'                      |
|              | WRKY104-QR       | 5' AAGATTGGTCAGCTTTTGTAGTGTCTC 3'                 |
|              | WRKY104-ChIP-QFa | 5' TCACAACACTACAACATGGTGAGCAA 3'                  |
|              | WRKY104-ChIP-QRa | 5' TTCGTTTTCCCTTTAGCTTCTG 3'                      |
|              | WRKY104-ChIP-QFb | 5' CATGCCGAACCTTAGGTGGA 3'                        |
|              | WRKY104-ChIP-QRb | 5' GTCGTTTTTGTAGTTCGCTGTTGTGT 3'                  |
|              | WRKY104-ChIP-QFc | 5' GAGAAGATCTACCATTGCTCTATAGCT 3'                 |
|              | WRKY104-ChIP-QRc | 5' CGAGTGGATTATTACTAGCTTAGTGAAT 3'                |
|              | WRKY104-ChIP-QFd | 5' CCACAAGTGACCCCATCCAT 3'                        |
|              | WRKY104-ChIP-QRd | 5' CCTGAGCATATCATTAAAAAATATCT 3'                  |
|              | WRKY104-ChIP-QFe | 5' TTAGGATGAAGTTCTGAGCAAAAAC 3'                   |
|              | WRKY104-ChIP-QRe | 5' GGGTTCTATTCTAGGATGTCTCTCC 3'                   |
|              | 25s-ChIP-QF      | 5' GGGACTACCCGCTGAGTTTA 3'                        |
|              | 25s-ChIP-QR      | 5' GGACGCCTCTCCAGACTACA 3'                        |
| Gene cloning | pCold-OsABF1-F   | 5' ATCCGAATTCAAGCTT<br>ATGATGGCGTCGAGGGTG 3'      |
|              | pCold-OsABF1-R   | 5' GCAGGTCGACAAGCTT<br>CTACCACTCCATCGAGTTTGTCT 3' |
|              | pDONR-OsABF1-F   | 5' CAAAAAAGCAGGCTTC<br>ATGATGGCGTCGAGGGTG 3'      |
|              | pDONR-OsABF1-R   | 5' CAAGAAAGCTGGGTC<br>CCACTCCATCGAGTTTGTCT 3'     |
|              | attB adaptor-F   | 5'<br>GTGGGGACAAGTTTGTACAAAAAAGCAGGCTT<br>C 3'    |
|              | attB adaptor-R   | 5'<br>GTGGGGACCACTTTGTACAAGAAAGCTGGGTC<br>3'      |

|                 |                                                         |
|-----------------|---------------------------------------------------------|
| OsABF1-OX-F     | 5' TCTGCACTAGGTACCTGCAG<br>ATGATGGCGTCGAGGGTG 3'        |
| OsABF1-OX-R     | 5' ATGGATCCGTCGACCTGCAG<br>CCACTCCATCGAGTTTGTCT 3'      |
| OsABF1-RNAi-F   | 5' CAAAAAAGCAGGCTTC<br>GCAGGAGCAGGAAGAGGCA 3'           |
| OsABF1-RNAi-R   | 5' CAAGAAAGCTGGGTC<br>GATCTCGTGCTGACGTTTCC 3'           |
| Ehd1-OX-F       | 5' TCTGCACTAGGTACCTGCAG<br>ATGGATCACCGAGAGCTGTGG 3'     |
| Ehd1-OX-R       | 5' ATGGATCCGTCGACCTGCAG<br>GAAATTCCAAAAACATGGTCCAT 3'   |
| Ehd1-RNAi-F     | 5' CAAAAAAGCAGGCTTC<br>TTGATTTCTGCTAAAACCTGTG 3'        |
| Ehd1-RNAi-R     | 5' CAAGAAAGCTGGGTC<br>CGAGGTCTCGTATGTCCGTGA 3'          |
| WRKY104-OX-F    | 5' TCTGCACTAGGTACCTGCAG<br>ATGAAAATTCTCGAATCTTTTGGTC 3' |
| WRKY104-OX-R    | 5' ATGGATCCGTCGACCTGCAG<br>TCCCATATGCATATTGGACTG 3'     |
| pDONR-WRKY104-F | 5' CAAAAAAGCAGGCTTC<br>ATGAAAATTCTCGAATCTTTTGGTC 3'     |
| pDONR-WRKY104-R | 5' CAAGAAAGCTGGGTC<br>TCCCATATGCATATTGGACTG 3'          |
| OsABF1-BD-F     | 5' CATGGAGGCCGAATTC<br>ATGATGGCGTCGAGGGTGATGG 3'        |
| OsABF1-BD-R     | 5' GGATCCCCGGGAATTC<br>CTACCACTCCATCGAGTTTGT 3'         |
| OsABF1-HA-BD-R  | 5' GGATCCCCGGGAATTC<br>TCTGGCACGTCGTAGGGGTA 3'          |
| OsABF1-Δ1-BD-F  | 5' CATGGAGGCCGAATTC<br>GGTGACAGGCCGATGTGCG 3'           |
| OsABF1-Δ3-BD-R  | 5' GGATCCCCGGGAATTC<br>CTGCCCTTGGCCGC 3'                |
| OsABF1-Δ2-BD-R  | 5' CCATCACCAC GCCGACGAGGGGCAGC 3'                       |
| OsABF1-Δ2-BD-F  | 5' CCTCGTCGGC GTGGTGATGGGGTTCCTGAA<br>3'                |
| DST-BD-F        | 5' CATGGAGGCCGAATTC<br>ATGGACTCCCCGTCGCCT 3'            |
| DST-BD-R        | 5' GGATCCCCGGGAATTC<br>CTAGAGGCTCAAGTTGAGGTGCA 3'       |
